# Supplementary material for: Analysis of Plasma Metabolic Profile on Ganglion Cell–Inner Plexiform Layer Thickness With Mortality and Common Diseases
Source: PubMed Central journal article supplement (PMC10189567; doi:10.1001/jamanetworkopen.2023.13220), 2023-05-16
Supplement: jamanetwopen-e2313220-s002.pdf [file jamanetwopen-e2313220-s002.pdf]

## Data Sharing Statement

Yang. Analysis of Plasma Metabolic Profile on Ganglion Cell–Inner Plexiform Layer Thickness With Mortality and Common Diseases. *JAMA Netw Open*. Published May 16, 2023.

doi:10.1001/jamanetworkopen.2023.13220

### Data

**Data available:** Yes

**Data types:** Deidentified participant data

**How to access data:** <http://www.ukbiobank.ac.uk>

**When available:** With publication

### Supporting Documents

**Document types:** None

### Additional Information

**Who can access the data:** Researchers whose proposed use of the data has been approved

**Types of analyses:** For research purposes.

**Mechanisms of data availability:** After approval of a proposal.
